# Supplementary material for: Clinical Burden of Chronic Obstructive Pulmonary Disease in Patients with Suboptimal Peak Inspiratory Flow
Source: Hindawi journal article supplement (doi:10.1155/2024/8034923), 2024-03-22
Supplement: f1 [file 8034923.f1.zip]

## Clinical Burden of Chronic Obstructive Pulmonary Disease in Patients With Suboptimal Peak Inspiratory Flow

### Supplementary Material

Figure S1. Distribution of airflow limitation categories in participants with oPIF and sPIF against the simulated medium-low resistance in trials 0128 and 0149.

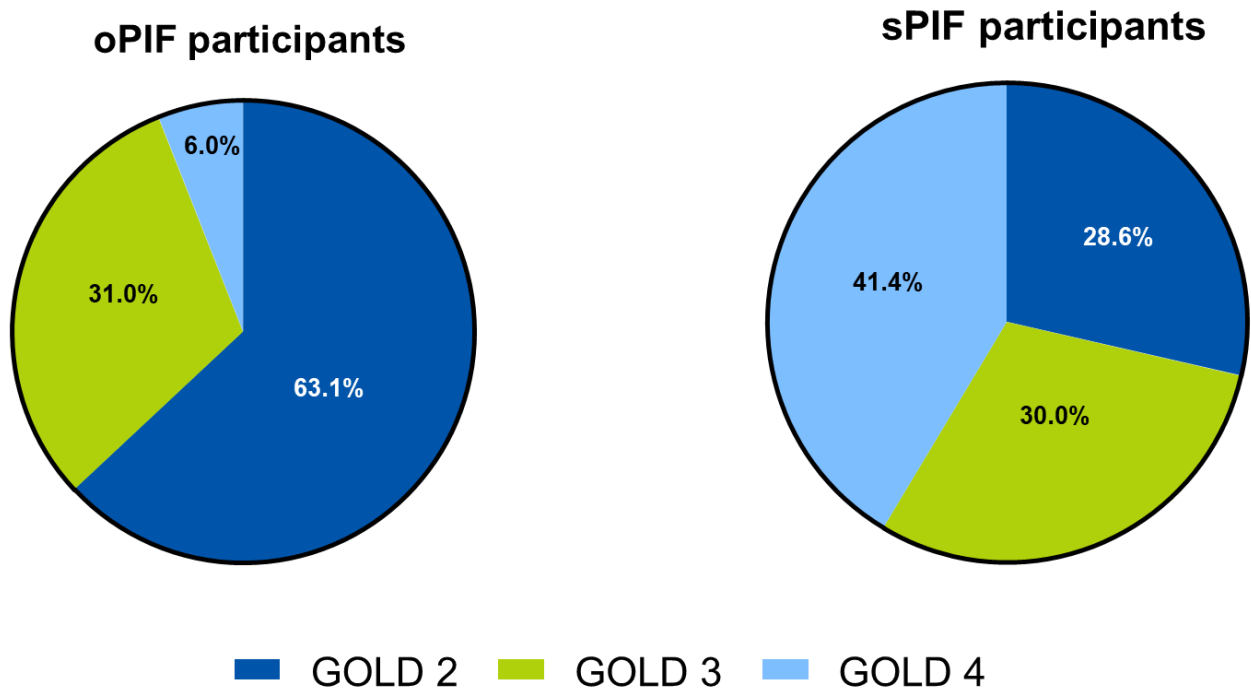

GOLD = Global Initiative for Chronic Obstructive Lung Disease; GOLD 2 = FEV1 50%–79% predicted; GOLD 3 = FEV1 30%–49% predicted; GOLD 4 = FEV1 < 30% predicted; oPIF = optimal PIF; sPIF = suboptimal PIF.
